# Supplementary material for: Effects of Temporal Resolution on an Inferential Model of Animal Movement
Source: PLOS journal article supplement (doi:10.1371/journal.pone.0057640), 2013-05-06
Supplement: S2 (10.1371/journal.pone.0057640.s002) [file journal.pone.0057640.s002]

## Appendix S1

In this appendix, we describe the algorithm which is used to sub-sample the trajectories. For each dataset, we used intervals of  $m \in (5, 10, 15, 20, 25, 30, 35, 40, 45, 50, 55, 60)$ , and a maximum time difference between successive points of  $p = 1.5m$ .

Sub-sampling algorithm:

1. For  $i=1$  to  $T$ , find  $dt(i)=t(i+1)-t(i)$ . If  $dt(i)<m-2.5$ , then discard point  $(i+1)$ . Repeat until  $dt(i) \geq m-2.5$ .
2. (a) If  $dt(i) \leq p$ , keep data point  $(i+1)$  and return to 1.  
(b) If  $dt(i) > p$ , then the dataset from points 1 to  $i$  forms a sub-trajectory. Store sub-trajectory and remove from the dataset, return to 1.
